# Supplementary material for: Targeted sequencing of circulating cell-free DNA in stage II-III resectable oesophageal squamous cell carcinoma patients
Source: PubMed Central journal article supplement (PMC6701116; doi:10.1186/s12885-019-6025-2), 2019-08-20

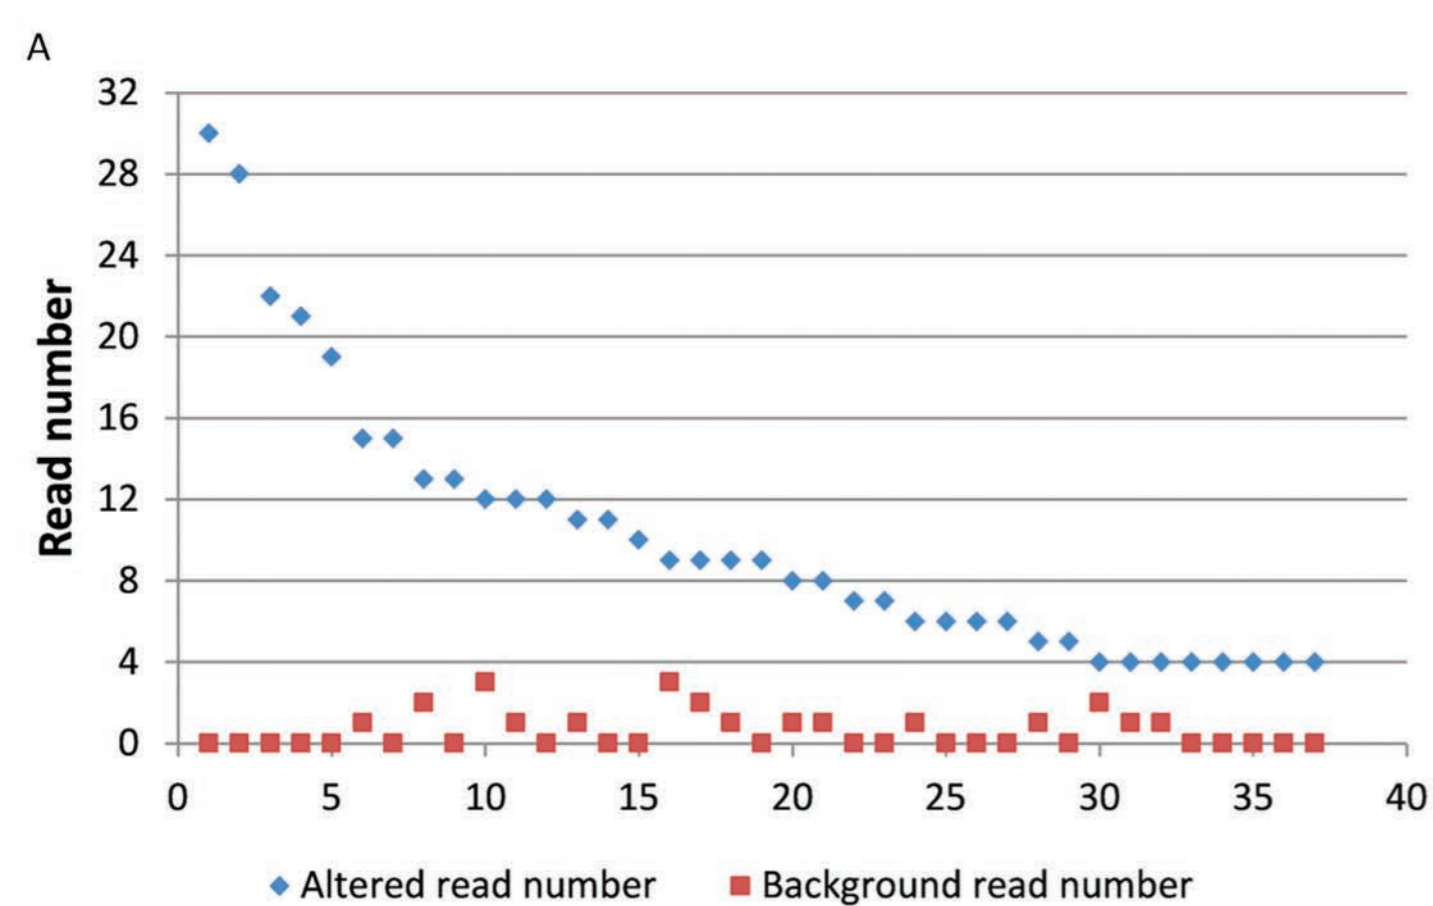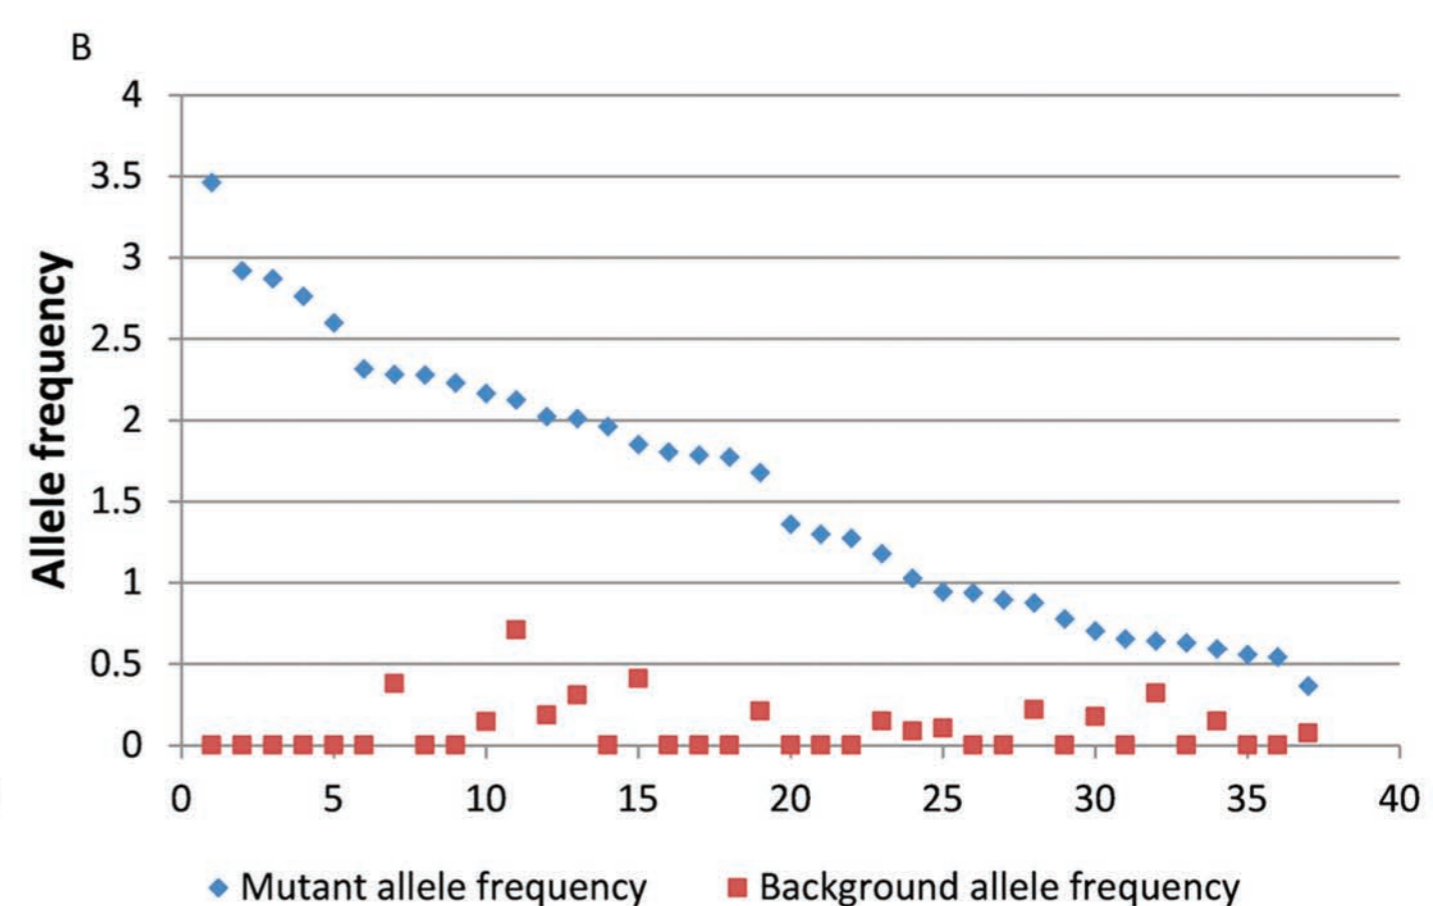

Supplement: 12885_2019_6025_MOESM6_ESM.pdf [file 12885_2019_6025_MOESM6_ESM.pdf]
